1 **Running Title:** Low-rate glufosinate selection  
2 **Recurrent selection with glufosinate at low rates reduces the susceptibility of a**  
3 ***Lolium perenne* ssp. *multiflorum* population to glufosinate**

4

5 Maor Matzrafi<sup>1,2,\*</sup>, Sarah Morran<sup>1,3</sup> and Marie Jasieniuk<sup>1</sup>

6 <sup>1</sup>Department of Plant Sciences, University of California-Davis, Davis, CA 95616, USA

7 Current address: <sup>2</sup>Department of Plant Pathology and Weed Research, Agricultural  
8 Research Organization, Newe Ya'ar Research Center, Israel. <sup>3</sup>Department of  
9 Bioagricultural Sciences and Pest Management, 1177 Campus Delivery, Colorado State  
10 University, Fort Collins, CO, 80523, USA.

11 \*Correspondence: Maor Matzrafi, Department of Plant Pathology and Weed Research,  
12 Agricultural Research Organization, Newe Ya'ar Research Center, Israel.

13 (Email: [maorm@volcani.agri.gov.il](mailto:maorm@volcani.agri.gov.il)).

14

15 **ABSTRACT**

16 Repeated applications of herbicides at the labelled rates have often resulted in the  
17 selection and evolution of herbicide-resistant weeds capable of surviving the labelled and  
18 higher rates in subsequent generations. However, the evolutionary outcomes of recurrent  
19 herbicide selection at low rates are far less understood. In this study of an herbicide-  
20 susceptible population of *Lolium perenne* ssp. *multiflorum*, we assessed the potential for  
21 low glufosinate rates to select for reduced susceptibility to the herbicide, and cross-  
22 resistance to herbicides with other modes of action. Reduced susceptibility to glufosinate  
23 was detected in progeny in comparison with the parental population following three  
24 rounds of selection at low glufosinate rates. Differences were mainly observed at the  
25 0.5X, 0.75X, and 1X rates. Comparing the parental susceptible population and progeny  
26 from the second and third selection cycle, the percentage of surviving plants increased to  
27 values of LD<sub>50</sub> (1.31 and 1.16, respectively) and LD<sub>90</sub> (1.36 and 1.26, respectively).  
28 When treated with three alternative herbicides (glyphosate, paraquat, and sethoxydim),  
29 no plants of either the parental or successive progeny populations survived treatment with  
30 0.75X or higher rates of these herbicides. The results of this study provide clear evidence  
31 that reduced susceptibility to glufosinate can evolve in weed populations following  
32 repeated applications of glufosinate at low herbicide rates. However, the magnitude of  
33 increases in resistance levels over three generations of recurrent low-rate glufosinate  
34 selection observed is relatively low compared with higher levels of resistance observed in  
35 response to low-rate selection with other herbicides (three fold and more).

36 **Key words:** Low-dose selection, herbicide resistance, resistance evolution, Italian  
37 ryegrass, California.

## 38 1. INTRODUCTION

39 Weeds are the major pests limiting crop production in agricultural systems.<sup>1</sup> Treatment  
40 with herbicides is by far the most effective method of controlling weeds although  
41 repeated applications of herbicides select for, and can result in, the evolution of herbicide  
42 resistance.<sup>2,3</sup> When applied at labelled field rates, herbicides have often selectively  
43 favoured individuals possessing major resistance alleles and target-site resistance (TSR)  
44 that spread rapidly within and among weed populations.<sup>2,3</sup> However, the evolutionary  
45 outcomes of recurrent herbicide selection at rates lower than the labelled rates are far less  
46 understood. It has been suggested that repeated applications of herbicides at lower than  
47 labelled rates selects for polygenic herbicide resistance in weeds.<sup>4,5</sup> Consequently, each  
48 subsequent generation of selection is predicted to result in a slow shift of the entire  
49 population towards resistance. For instance, recurrent selection with low rates of  
50 dicamba<sup>6</sup> and glyphosate<sup>7</sup> only resulted in 2.15- to 3-fold lower susceptibility of  
51 *Amaranthus palmeri* to these herbicides over three to four generations in comparison to  
52 the parental populations. In contrast, however, three generations of recurrent selection  
53 with low rates of diclofop-methyl resulted in high level (56-fold) of resistance in *Lolium*  
54 *perenne* ssp. *rigidum*.<sup>8</sup>

55 Recurrent selection at low herbicide rates has sometimes also resulted in the  
56 selection of progeny with cross-resistance to other herbicides. For instance, repeated  
57 applications of pyroxasulfone at low rates resulted in the selection of a *L. perenne* ssp.  
58 *rigidum* population that was resistant to pyroxasulfone and cross-resistant to  
59 chlorsulfuron, diclofop-methyl and S-metolachlor.<sup>9</sup> In *Avena fatua*, repeated applications  
60 of diclofop-methyl, an ACCase (acetyl CoA carboxylase)-inhibiting herbicide, at low

61 rates for three consecutive generations resulted in the selection of progeny populations  
62 with reduced susceptibility to diclofop-methyl and cross-resistance to ALS-inhibiting  
63 herbicides.<sup>10</sup>

64 *L. perenne* ssp. *multiflorum* (Italian ryegrass) is one of the major weed species in  
65 orchards, vineyards, field crops, and fallow fields of California.<sup>11,12</sup> Extensive herbicide  
66 use has exerted strong selection that has resulted in the evolution of herbicide resistance  
67 in many populations of this weed species in California.<sup>12-16</sup> Resistance to  
68 glyphosate,<sup>12,14,17</sup> paraquat, and the ACCase inhibitor, sethoxydim,<sup>15</sup> as well as multiple  
69 herbicide resistance to these three herbicides plus acetolactate synthase (ALS)  
70 inhibitors<sup>15,16</sup> have been confirmed in populations across the agricultural landscape of  
71 northern California. Consequently, the management of herbicide-resistant *L. perenne* ssp.  
72 *multiflorum* has become a major challenge in California annual and perennial cropping  
73 systems.

74 Glufosinate is an alternative non-selective post-emergence herbicide that can still  
75 be used to control herbicide-susceptible and most herbicide-resistant *L. perenne* ssp.  
76 *multiflorum* in California as only two populations with glufosinate resistance have been  
77 documented to date.<sup>14</sup> Both are populations with low resistance levels (1.6-2 fold)  
78 compared to the standard susceptible population. Worldwide, six additional cases of  
79 glufosinate resistance have been reported in *Lolium* species.<sup>18</sup> In Oregon, both target site  
80 and non-target site mechanisms were suggested as endowing resistance to glufosinate in  
81 *L. perenne* ssp. *multiflorum* populations.<sup>19,20</sup>

82 The relatively high cost of glufosinate, as well as the increasing abundance of  
83 weeds resistant to alternative herbicides, may drive farmers to apply more glufosinate,

84 but at reduced rates. This, among other drivers such as herbicide applications at non-  
85 optimal weed size, inappropriate weather conditions, and insufficient spray coverage may  
86 result in sublethal rate herbicide selection. Thus, there is a need to assess the potential for  
87 recurrent selection with glufosinate at low rates in *L. perenne* ssp. *multiflorum*, the weed  
88 species with a high propensity to evolve resistance to herbicides with different modes of  
89 action.

90 Hence, the objectives of the present study were: (1) to evaluate the potential for  
91 low glufosinate rates to select for reduced susceptibility to the herbicide and (2) to  
92 determine if selected populations are cross-resistant to herbicides with other modes of  
93 action that are commonly used to control *L. perenne* ssp. *multiflorum* in orchards and  
94 vineyards of California.

## 95 **2. MATERIALS AND METHODS**

### 96 **2.1 Plant material**

97 Seeds of a previously characterized herbicide-susceptible population of *L. perenne* ssp.  
98 *multiflorum* from a vineyard in Sonoma County, California<sup>15,16</sup> constituted the parental  
99 population (P<sub>0</sub>) for this study. Seeds were germinated on moistened filter paper in Petri  
100 plates with 1% v/v Captan 80 WDG (Agri Star, Ankeny, IA, USA) and incubated at  
101 ambient temperature under a 12-h photoperiod provided by fluorescent lights (160  $\mu\text{mol}$   
102  $\text{m}^2 \text{s}^{-1}$ ). Seedlings at the one- to two-leaf stage were transplanted into plastic pots (5 cm  
103 height  $\times$  4.5 cm diameter) filled with UCD Ron's soil mix (1:1:1:3  
104 sand/compost/peat/dolomite). Pots were maintained in a growth chamber (model PGV  
105 36; Conviron Ltd., Winnipeg, MB, Canada) under 25/19 + 3° C (day/night) temperature  
106 and 12-h photoperiod using high pressure sodium lamps (600  $\mu\text{mol m}^2 \text{s}^{-1}$ ).

## 107 **2.2 Recurrent selection with glufosinate at low rates**

108 Six hundred P<sub>0</sub> seedlings at the three- to four-leaf stage (8-10 cm tall) were divided into  
109 three sets of 200 seedlings. Each set of 200 P<sub>0</sub> seedlings was treated with glufosinate  
110 (Rely 280®, Bayer CropScience) at one of three rates (123, 246, or 492 g ai ha<sup>-1</sup>),  
111 equivalent to 0.125X, 0.25X, and 0.5X of the labelled field rate (984 g ai h<sup>-1</sup>). Glufosinate  
112 was applied using an automated track sprayer equipped with a 8001E flat-fan nozzle  
113 (TeeJet Technologies, Springfield, IL, USA) calibrated to deliver 187 L ha<sup>-1</sup> at 296 KPa.  
114 Treated plants were maintained in the growth chamber under the conditions described  
115 above. The number of surviving plants was recorded 21 days after treatment (DAT).  
116 Glufosinate at the 492 g ai ha<sup>-1</sup> resulted in highest plant mortality (76.5%) among the  
117 rates used. All 47 surviving plants were transplanted into larger round plastic pots (2.37  
118 L) filled with commercial potting mix (LC1, Sun Gro Horticulture, AB, Canada), grown  
119 to maturity under the conditions described above, and allowed to cross-pollinate. Mature  
120 seeds that were collected from these plants, designated the P<sub>1</sub> generation, were air-dried  
121 at room temperature and stored at 4° C for four to six weeks to overcome dormancy and  
122 maximize germination for a subsequent round of selection.

123 For the second round of selection, P<sub>1</sub> seeds were germinated and seedlings  
124 transplanted into pots and grown to the three- to four-leaf stage, as described above. For  
125 this selection round, 900 P<sub>1</sub> seedlings were divided into three sets of 300 seedlings. Each  
126 set of 300 P<sub>1</sub> plants was treated with glufosinate at one of three slightly higher rates of  
127 glufosinate (0.5X, 0.75X, and 1X) than in the first round of selection. Approximately 50  
128 surviving plants were selected from the 738 g ai ha<sup>-1</sup> rate (0.75X), which resulted in 79%  
129 plant mortality, and transplanted into larger pots, grown to maturity, and allowed to

130 cross-pollinate. Mature seeds were collected, designated the P<sub>2</sub> generation, and stored for  
131 four to six weeks to overcome dormancy. A similar approach was taken for an additional  
132 round of selection with glufosinate at three higher rates, equivalent to 0.75X, 1X, and  
133 1.25X the labelled field rate, to produce the P<sub>3</sub> generation of seeds.

### 134 **2.3 Dose-response of the parental and selected populations to glufosinate**

135 To compare the response of the parental population (P<sub>0</sub>) and the selected progeny  
136 populations (P<sub>1</sub>, P<sub>2</sub>, P<sub>3</sub>) to glufosinate, seedlings at the 3- to 4-leaf stage (8-10 cm) from  
137 each generation were treated with glufosinate at seven rates (0.125X, 0.25X, 0.5X,  
138 0.75X, 1X, 2X and 4X). Following treatment, plants were kept for 21 days in the growth  
139 chamber under the environmental conditions described earlier. The experiment was  
140 conducted in a complete randomized design (CRD) with 10-12 replications of individual  
141 plants from each generation per treatment and repeated. Plant survival was recorded 21  
142 DAT.

### 143 **2.4 Cross-resistance to glyphosate, paraquat, and sethoxydim**

144 In an experimental design (CRD) similar to that described above for the glufosinate dose-  
145 response study, cross-resistance to other herbicides was assessed for the parental  
146 population (P<sub>0</sub>) and for the three selected progeny populations (P<sub>1</sub>, P<sub>2</sub>, P<sub>3</sub>). The  
147 experiment was repeated. Seedlings at the 3- to 4-leaf stage (8-10 cm) from each  
148 generation were treated with seven rates (0.125X, 0.25X, 0.5X, 0.75X, 1X, 2X and 4X)  
149 of glyphosate (Roundup PowerMax<sup>®</sup>, Monsanto; 1X = 867 g ae ha<sup>-1</sup>), paraquat  
150 (Gramoxone SL 2.0<sup>®</sup>, Syngenta Crop Protection; 1X = 560 g ai ha<sup>-1</sup>) and sethoxydim  
151 (Poast<sup>®</sup>, BASF Corporation; 1X = 515 g ai ha<sup>-1</sup>). Crop oil concentrate (COC; Helena  
152 Chemical Company, Collierville, TN) at 1% V/V and Nonionic surfactant (NIS; Helena

153 Chemical Company) at 0.25% V/V were added to spray solutions containing sethoxydim  
154 and paraquat respectively. Treated plants were kept in a growth chamber under the  
155 environmental conditions described earlier and plant survival recorded 21 DAT.

## 156 **2.5 Statistical analyses**

157 Plant survival and shoot biomass data were pooled over the two runs of each experiment  
158 due to nonsignificant differences between runs for all experiments. For all herbicides,  
159 plant survival data from the dose-response experiments for the P<sub>0</sub>, P<sub>1</sub>, P<sub>2</sub>, and P<sub>3</sub>  
160 populations were fit to a binomial two-parameter log-logistic model using the drc  
161 package of R version 3.5.1<sup>21</sup> and the LD<sub>50</sub> values (rate required for 50% plant mortality)  
162 and LD<sub>90</sub> values (rate required for 90% plant mortality) estimated.

163 To further assess cross-resistance of the P<sub>0</sub>, P<sub>1</sub>, P<sub>2</sub>, and P<sub>3</sub> populations to  
164 glyphosate, paraquat, and sethoxydim, data on the percentage of fresh shoot weight  
165 reduction from the dose-response experiments were fit to a nonlinear sigmoidal logistic  
166 three-parameter model.<sup>22</sup>

167 All data was visualized using SigmaPlot (ver. 13) software (Systat Software Inc.,  
168 San Jose, CA, USA).

## 169 **3. RESULTS AND DISCUSSION**

### 170 **3.1 Recurrent selection with glufosinate at low rates**

171 As expected, the percentage of P<sub>0</sub> plants surviving treatment with glufosinate was  
172 inversely related to the herbicide rate, with 100%, 90.5%, and 23.5% of plants surviving  
173 0.125X, 0.25X, and 0.5X times the labelled field rate of glufosinate, respectively, 21  
174 DAT (Table 1). Repeated selection with glufosinate at low rates over three consecutive  
175 generations produced three successive populations (P<sub>1</sub>, P<sub>2</sub>, and P<sub>3</sub>) of progeny with an



176 increasing percentage of plants surviving treatment with glufosinate at a specific rate.  
177 Thus, whereas only 23.5% of P<sub>0</sub> plants survived the 0.5X rate of glufosinate, a larger  
178 percentage (71%) of P<sub>1</sub> plants survived the same dose in the next generation (Table 1).  
179 Similarly, only 21% and 5% of P<sub>1</sub> plants, but 33% and 12% of P<sub>2</sub> plants, survived the  
180 0.75X and 1X rates of the herbicide, respectively, indicating that selection with  
181 glufosinate at low rates had reduced susceptibility to the herbicide, as assessed by the  
182 increasing proportions of survivors at each rate over generations.

### 183 **3.2 Dose-response of parental and selected populations to glufosinate and other** 184 **herbicides**

185 Progeny populations P<sub>2</sub> and P<sub>3</sub> exhibited reduced susceptibility to glufosinate at  
186 rates ranging from the 0.5X to 1X the labelled field rate in comparison with the parental  
187 population (P<sub>0</sub>) (Fig. 1). LD<sub>50</sub> and LD<sub>90</sub> values for populations P<sub>2</sub> (592.08 and 1117.58 g  
188 ai/ae ha<sup>-1</sup>, respectively) and P<sub>3</sub> (529.2 and 1038.16 g ai/ae ha<sup>-1</sup>, respectively) were higher  
189 in comparison with those of the P<sub>0</sub> (452.39 and 816.66 g ai/ae ha<sup>-1</sup>, respectively) and P<sub>1</sub>  
190 (429.95 and 888.82 g ai/ae ha<sup>-1</sup>, respectively) populations (Table 2). The level of  
191 resistance, as measured by the Resistance Index (RI) calculated using LD<sub>50</sub> values and the  
192 parental population P<sub>0</sub> as the susceptible standard, revealed RI values of 0.95, 1.31, and  
193 1.16 for the P<sub>1</sub>, P<sub>2</sub>, and P<sub>3</sub> populations, respectively. Based on LD<sub>90</sub> values, RI values  
194 were 1.08, 1.36, and 1.26 for the P<sub>1</sub>, P<sub>2</sub>, and P<sub>3</sub> populations, respectively. Our results  
195 clearly show that the percentage of plants surviving glufosinate was higher for the P<sub>2</sub> and  
196 P<sub>3</sub> progeny populations compared to the parental population P<sub>0</sub> (Table 2), however, in  
197 comparison to low-rate selection studies with other herbicides, the level of resistance did  
198 not increase substantially.

### 199 **3.3 Cross-resistance to glyphosate, paraquat, and sethoxydim**

200 Interestingly, no plants of the parental population or the P<sub>1</sub>, P<sub>2</sub>, and P<sub>3</sub> progeny  
201 survived glyphosate, paraquat, and sethoxydim treatments equal to and greater than  
202 0.75X the labelled rates of these herbicides (Fig. 2A-C, Table 3). Busi et al.<sup>5</sup> suggested  
203 that selection using low rates may hasten the evolution of polygenic herbicide resistance,  
204 especially in cross-pollinated species such as *L. perenne* ssp. *multiflorum*. The authors  
205 suggest that reduced sensitivity to chlorsulfuron was observed in progeny from low-rate  
206 diclofop methyl selection, apparently as a result of enhanced detoxification of both  
207 herbicides.<sup>23</sup> Cross-resistance to glufosinate and glyphosate was previously suggested in  
208 *L. perenne* from Oregon and the resistance hypothesized to be non-target-site related.<sup>20</sup> In  
209 this study, reduced susceptibility to the 0.5X rate of glyphosate was detected following  
210 two and three generations of selection with low rates of glufosinate (Table 3) but further  
211 research is required to determine whether this is due to cross-resistance.

212 In most recurrent low rate selection studies, resistance level exceeded 3-fold after  
213 three generations of low-rate selection.<sup>6,8,10,24</sup> In this study, the magnitude of increases in  
214 resistance levels over three generations of recurrent low-rate glufosinate selection  
215 observed contrast with the higher levels of resistance observed in response to low-rate  
216 selection with other herbicides. However, the results are consistent with previous studies  
217 of glufosinate resistance in *Lolium* species, which generally observe lower levels of  
218 resistance to glufosinate with R/S ratios ranging from 1.6 to 2.8 fold.<sup>14,19,20</sup> Our earlier  
219 work<sup>14</sup> also found significant variability in response to glufosinate among individuals in  
220 California populations of *L. perenne* ssp. *multiflorum* and a strong influence of  
221 environmental conditions on glufosinate efficacy and sensitivity, which has also been

222 detected in *Raphanus raphanistrum*<sup>25</sup> and *A. rudis*, *A. palmeri* and *A. retroflexus*.<sup>26</sup>  
223 Whether the evolution of glufosinate resistance in weed populations is more complex  
224 than resistance evolution to other herbicides remains to be investigated. However, the  
225 results of this study provide clear evidence that reduced susceptibility to glufosinate can  
226 evolve in weed populations following repeated applications of glufosinate at low  
227 herbicide rates.

228 In summary, in this study we showed that three generations of recurrent selection  
229 with glufosinate at low rates (i.e., lower than the labelled field rates) was sufficient to  
230 reduce the susceptibility of subsequent generations (P<sub>1</sub>-P<sub>3</sub>) of progeny to the herbicide  
231 compared with the parental population (P<sub>0</sub>) (Fig. 1). Our findings are consistent with the  
232 results of other studies showing that recurrent low-rate selection may lead to the  
233 evolution of herbicide resistance.<sup>5,6,10,24</sup> Reduced susceptibility to paraquat and  
234 sethoxydim with successive generations of glufosinate selection was not observed. The  
235 increases in frequency of plants surviving increasing glufosinate rates each successive  
236 generation may reflect a shift in mean response at the population level indicative of  
237 directional selection on quantitative trait variation and, possibly, non-target site related  
238 glufosinate resistance.

## 239 **ACKNOWLEDGMENTS**

240 We are grateful to Chad Fautt for greenhouse and laboratory assistance, and Hannah  
241 Clifton for greenhouse maintenance. This study was funded by Bayer CropScience AG  
242 and by BASF Corporation. No conflicts of interest have been declared.

243 **REFERENCES**

- 244 1 Oerke EC, Crop losses to pests. *J Agric Sci* **144**:31–43 (2006).
- 245 2 Powles SB and Yu Q, Evolution in action: plants resistant to herbicides. *Annu Rev*  
246 *Plant Biol* **61**:317–347 (2010).
- 247 3 Délye C, Jasieniuk M, and Le Corre V, Deciphering the evolution of herbicide  
248 resistance in weeds. *Trends Genet* **29**:649–658 (2013).
- 249 4 Manalil S, Renton M, Diggle A, Busi R, and Powles SB, Simulation modelling  
250 identifies polygenic basis of herbicide resistance in a weed population and  
251 predicts rapid evolution of herbicide resistance at low herbicide rates. *Crop Prot*  
252 **40**:114–120 (2012).
- 253 5 Busi R, Neve P, and Powles S, Evolved polygenic herbicide resistance in *Lolium*  
254 *rigidum* by low-dose herbicide selection within standing genetic variation. *Evol*  
255 *Appl* **6**:231–242 (2013).
- 256 6 Tehranchian P, Norsworthy JK, Powles S, Bararpour MT, Bagavathiannan MV,  
257 Barber T, *et al.*, Recurrent sublethal-dose selection for reduced susceptibility of  
258 palmer amaranth (*Amaranthus palmeri*) to dicamba. *Weed Sci* **65**:206–212 (2017).
- 259 7 Norsworthy JK, Repeated sublethal rates of glyphosate lead to decreased  
260 sensitivity in palmer amaranth. *Crop Manag* **11**: doi:10.1094/CM-2012-0403-01-  
261 RS. (2012).
- 262 8 Neve P and Powles S, Recurrent selection with reduced herbicide rates results in  
263 the rapid evolution of herbicide resistance in *Lolium rigidum*. *Theor Appl Genet*  
264 **110**:1154–1166 (2005).
- 265 9 Busi R, Gaines TA, Walsh MJ, and Powles SB, Understanding the potential for

- 266 resistance evolution to the new herbicide pyroxasulfone: field selection at high  
267 doses versus recurrent selection at low doses. *Weed Res* **52**:489–499 (2012).
- 268 10 Busi R, Girotto M, and Powles SB, Response to low-dose herbicide selection in  
269 self-pollinated *Avena fatua*. *Pest Manag Sci* **72**:603–608 (2016).
- 270 11 DiTomaso JM and Healy EA, Weeds of California and other Western States,  
271 Volumen 2, California Division of Agriculture and Natural Resources, Oakland,  
272 pp. 1195–1200 (2007).
- 273 12 Jasieniuk M, Ahmad R, Sherwood AM, Firestone JL, Perez-Jones A, Lanini WT,  
274 *et al.*, Glyphosate-resistant Italian ryegrass (*Lolium multiflorum*) in California:  
275 distribution, response to glyphosate, and molecular evidence for an altered target  
276 enzyme. *Weed Sci* **56**:496–502 (2008).
- 277 13 Brunharo CACG and Hanson BD, Vacuolar sequestration of paraquat is involved  
278 in the resistance mechanism in *Lolium perenne* L. spp. *multiflorum*. *Front Plant*  
279 *Sci* **8**:1485 (2017).
- 280 14 Karn E, Beffa R, and Jasieniuk M, Variation in response and resistance to  
281 glyphosate and glufosinate in California populations of Italian ryegrass (*Lolium*  
282 *perenne* ssp. *multiflorum*). *Weed Sci* **66**:168–179 (2018).
- 283 15 Tehranchian P, Nandula V, Jugulam M, Putta K, and Jasieniuk M, Multiple  
284 resistance to glyphosate, paraquat and ACCase-inhibiting herbicides in Italian  
285 ryegrass populations from California: Confirmation and mechanisms of resistance.  
286 *Pest Manag Sci* **74**:868–877 (2018).
- 287 16 Tehranchian P, Nandula VK, Matzrafi M, and Jasieniuk M, Multiple herbicide  
288 resistance in California Italian ryegrass (*Lolium perenne* ssp. *multiflorum*):

- 289            characterization of ALS-inhibiting herbicide resistance. *Weed Sci* **67**:273–280  
290            (2019).
- 291    17    Simarmata M, Kaufmann JE, and Penner D, Potential basis of glyphosate  
292            resistance in California rigid ryegrass (*Lolium rigidum*). *Weed Sci* **51**:678–682  
293            (2003).
- 294    18    Heap I, The international survey of herbicide resistant weeds, 2020.  
295            <http://www.weedscience.com>.
- 296    19    Avila-Garcia WV., Sanchez-Olguin E, Hulting AG, and Mallory-Smith C, Target-  
297            site mutation associated with glufosinate resistance in Italian ryegrass (*Lolium*  
298            *perenne* L. ssp. *multiflorum*). *Pest Manag Sci* **68**:1248–1254 (2012).
- 299    20    Avila-Garcia W V. and Mallory-Smith C, Glyphosate-resistant Italian ryegrass  
300            (*Lolium perenne*) populations also exhibit resistance to glufosinate. *Weed Sci*  
301            **59**:305–309 (2011).
- 302    21    R, Core T, R: A language and environment for statistical computing (2013).
- 303    22    Seefeldt SS, Jensen JE, and Fuerst EP, Feature log-logistic analysis of herbicide  
304            dose-response relationships. *Weed Technol* **9**:218–227 (1995).
- 305    23    Yu Q, Han H, Cawthray GR, Wang SF, and Powles SB, Enhanced rates of  
306            herbicide metabolism in low herbicide-dose selected resistant *Lolium rigidum*.  
307            *Plant Cell Environ* **36**:818–827 (2013).
- 308    24    Ashworth MB, Walsh MJ, Flower KC, and Powles SB, Recurrent selection with  
309            reduced 2,4-D amine doses results in the rapid evolution of 2,4-D herbicide  
310            resistance in wild radish (*Raphanus raphanistrum* L.). *Pest Manag Sci* **72**:2091–  
311            2098 (2016).

- 312 25 Kumaratilake AR and Preston C, Low temperature reduces glufosinate activity and  
313 translocation in wild radish (*Raphanus raphanistrum*). *Weed Sci* **53**:10–16 (2005).
- 314 26 Coetzer E, Al-Khatib K, and Loughin TM, Glufosinate efficacy, absorption, and  
315 translocation in amaranth as affected by relative humidity and temperature. *Weed*  
316 *Sci* **49**:8–13 (2001).
- 317

318 **Figure Legends**

319 **Figure 1.** Dose-response of *L. perenne* ssp. *multiflorum* parental (P<sub>0</sub>) and three  
320 successive generations (P<sub>1</sub>, P<sub>2</sub>, P<sub>3</sub>) of progeny, selected with low glufosinate rates,  
321 to treatment with glufosinate in the greenhouse. Lines are the predicted values for  
322 percentage survival. Red arrow indicates the labelled field rate (984 g ai h<sup>-1</sup>).

323 **Figure 2.** Dose-response of *L. perenne* ssp. *multiflorum* parental (P<sub>0</sub>) and three  
324 successive generations (P<sub>1</sub>, P<sub>2</sub>, P<sub>3</sub>) of progeny, selected with low rates of  
325 glufosinate, to treatment with glyphosate (A), sethoxydim (B) and paraquat in the  
326 greenhouse. Lines are the predicted values for fresh shoot weight. Red arrows  
327 indicate the labelled field rates for glyphosate (867 g ae ha<sup>-1</sup>), paraquat (560 g ai  
328 ha<sup>-1</sup>) and sethoxydim (515 g ai ha<sup>-1</sup>).

329



330 **Table 1.** Percentage of *L. perenne* ssp. *multiflorum* plants surviving treatment with  
 331 glufosinate at low (i.e., lower than the recommended labelled) rates.

| <b>Population</b>          | <b>Glufosinate rate<br/>(g ai ha<sup>-1</sup>)</b> | <b>Seedling<br/>treated (n)</b> | <b>Survivors<br/>(%)</b> |
|----------------------------|----------------------------------------------------|---------------------------------|--------------------------|
|                            | 123 (0.125X)                                       | 200                             | 100                      |
| Parental (P <sub>0</sub> ) | 246 (0.25X)                                        | 200                             | 90.5                     |
|                            | 492 (0.5X)                                         | 200                             | <b>23.5</b>              |
|                            | 492 (0.5X)                                         | 300                             | 71                       |
| P <sub>1</sub>             | 738 (0.75X)                                        | 300                             | <b>21</b>                |
|                            | 984 (1X)                                           | 300                             | 5                        |
|                            | 738 (0.75X)                                        | 300                             | <b>33</b>                |
| P <sub>2</sub>             | 984 (1X)                                           | 300                             | 12                       |
|                            | 1230 (1.25X)                                       | 300                             | 7                        |

332 \*bold text and grey highlighted boxes indicate the rates from which surviving plants were  
 333 selected for subsequent recurrent selection.

334

335 **Table 2.** Parameter estimates and associated model statistics for the log-logistic dose-  
 336 response curves of plant survival following treatment with glufosinate at low doses.

| <b>Population</b> | <sup>a</sup> LD <sub>50</sub><br>(g ai/ae ha <sup>-1</sup> ) | <b>SE</b> | <b>RI<sup>d</sup></b><br>(P <sub>n</sub> /P <sub>0</sub> ) |
|-------------------|--------------------------------------------------------------|-----------|------------------------------------------------------------|
| P <sub>0</sub>    | 452.39 (382.77-522.02) <sup>c</sup>                          | 35.52     | --                                                         |
| P <sub>1</sub>    | 429.95 (351.98-507.93)                                       | 39.78     | 0.95                                                       |
| P <sub>2</sub>    | 592.08 (502.46-681.7)                                        | 45.72     | 1.31                                                       |
| P <sub>3</sub>    | 529.2 (444.75-613.65)                                        | 43.08     | 1.16                                                       |
|                   | <sup>b</sup> LD <sub>90</sub><br>(g ai/ae ha <sup>-1</sup> ) | <b>SE</b> | <b>RI</b><br>(P <sub>n</sub> /P <sub>0</sub> )             |
| P <sub>0</sub>    | 817.66 (640.4-994.92)                                        | 90.44     | --                                                         |
| P <sub>1</sub>    | 888.82 (656.12-1121.5)                                       | 118.72    | 1.08                                                       |
| P <sub>2</sub>    | 1117.58 (839.05-1396.1)                                      | 142.10    | 1.36                                                       |
| P <sub>3</sub>    | 1038.16 (782.07-1294.3)                                      | 130.66    | 1.26                                                       |

337 <sup>a</sup>LD<sub>50</sub> - represents the rate that results in 50% mortality.

338 <sup>b</sup>LD<sub>90</sub> - represents the rate that results in 90% mortality.

339 <sup>c</sup>Values in parentheses indicate 95% confidence intervals.

340 <sup>d</sup>RI, the Resistance Index, is a population's LD<sub>50</sub> or LD<sub>90</sub> divided by the value of the  
 341 same parameter for the parental population, P<sub>0</sub>.

342

343 **Table 3.** Percentage of plants from the parental population ( $P_0$ ) and three generations of  
 344 progeny ( $P_1$ - $P_3$ ) that survived treatment with glyphosate, paraquat, and sethoxydim 21  
 345 DAT<sup>a</sup>.

|            |                   | <b>% survivors at each herbicide rate</b> |              |             |            |             |          |          |          |
|------------|-------------------|-------------------------------------------|--------------|-------------|------------|-------------|----------|----------|----------|
|            | <b>Population</b> | <b>0</b>                                  | <b>0.125</b> | <b>0.25</b> | <b>0.5</b> | <b>0.75</b> | <b>1</b> | <b>2</b> | <b>4</b> |
| Glyphosate | $P_0$             | 100                                       | 100          | 45          | 0          | 0           | 0        | 0        | 0        |
|            | $P_1$             | 100                                       | 100          | 20          | 0          | 0           | 0        | 0        | 0        |
|            | $P_2$             | 100                                       | 100          | 20          | 20         | 0           | 0        | 0        | 0        |
|            | $P_3$             | 100                                       | 80           | 20          | 20         | 0           | 0        | 0        | 0        |
| Paraquat   | $P_0$             | 100                                       | 0            | 0           | 0          | 0           | 0        | 0        | 0        |
|            | $P_1$             | 100                                       | 10           | 0           | 0          | 0           | 0        | 0        | 0        |
|            | $P_2$             | 100                                       | 0            | 0           | 0          | 0           | 0        | 0        | 0        |
|            | $P_3$             | 100                                       | 20           | 0           | 0          | 0           | 0        | 0        | 0        |
| Sethoxydim | $P_0$             | 100                                       | 10           | 10          | 0          | 0           | 0        | 0        | 0        |
|            | $P_1$             | 100                                       | 0            | 0           | 0          | 0           | 0        | 0        | 0        |
|            | $P_2$             | 100                                       | 0            | 0           | 0          | 0           | 0        | 0        | 0        |
|            | $P_3$             | 100                                       | 10           | 0           | 0          | 0           | 0        | 0        | 0        |

346 <sup>a</sup>  $n = 12$  for all other herbicides.

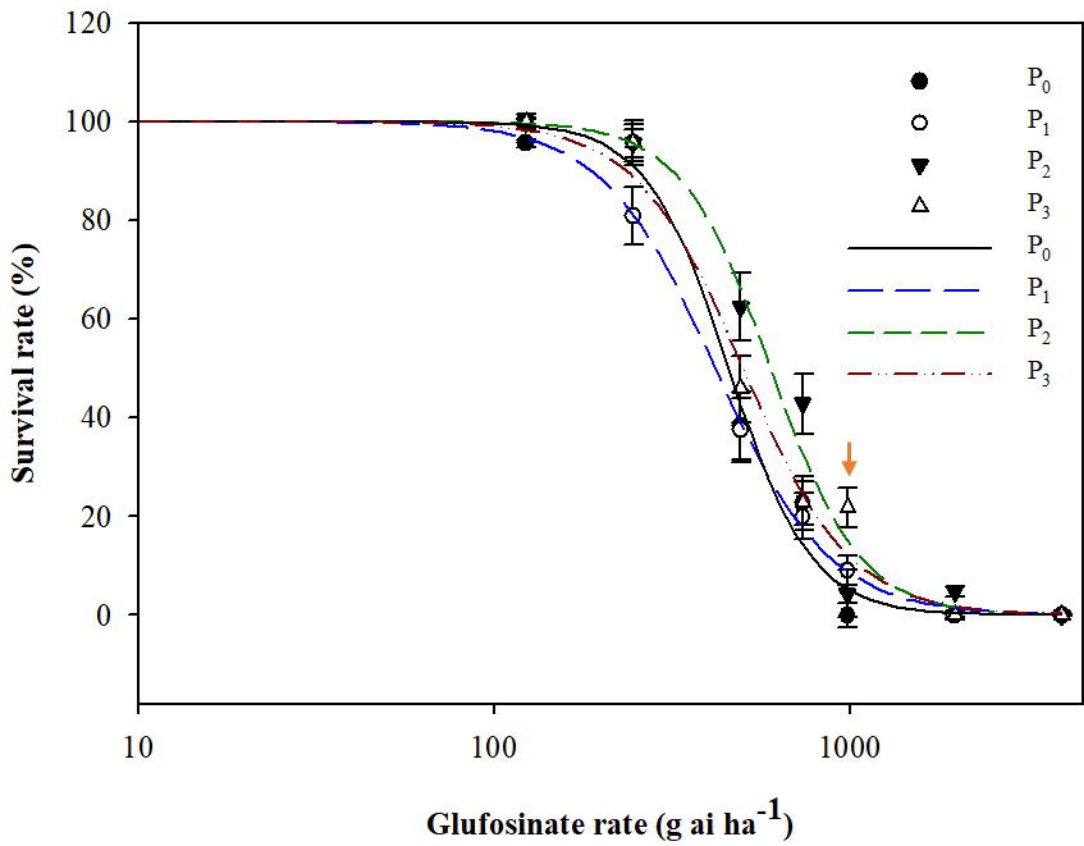

(A)

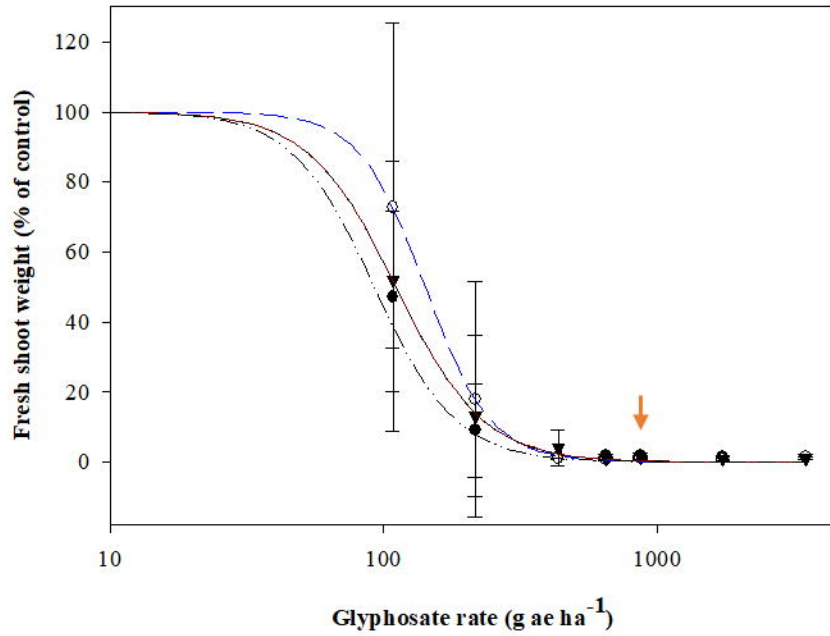

(B)

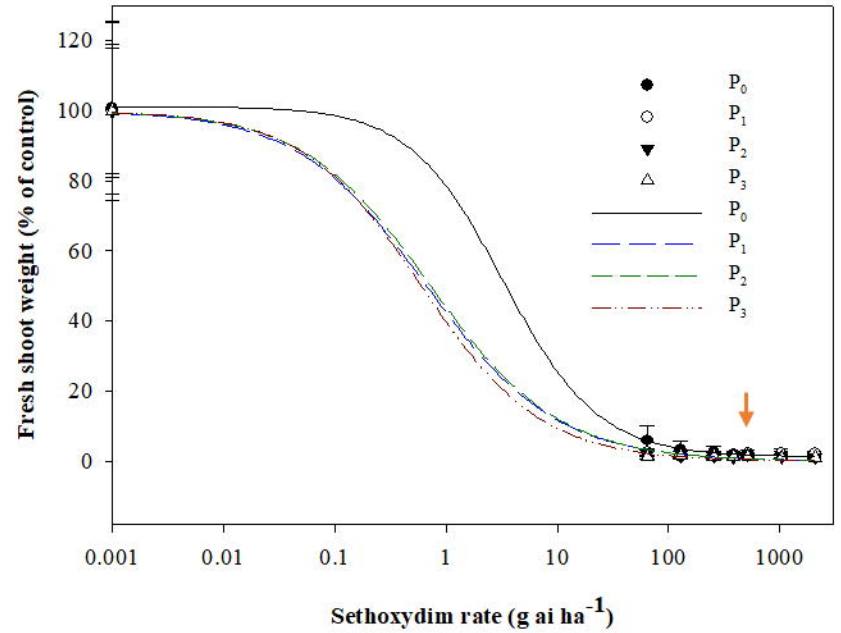

(C)

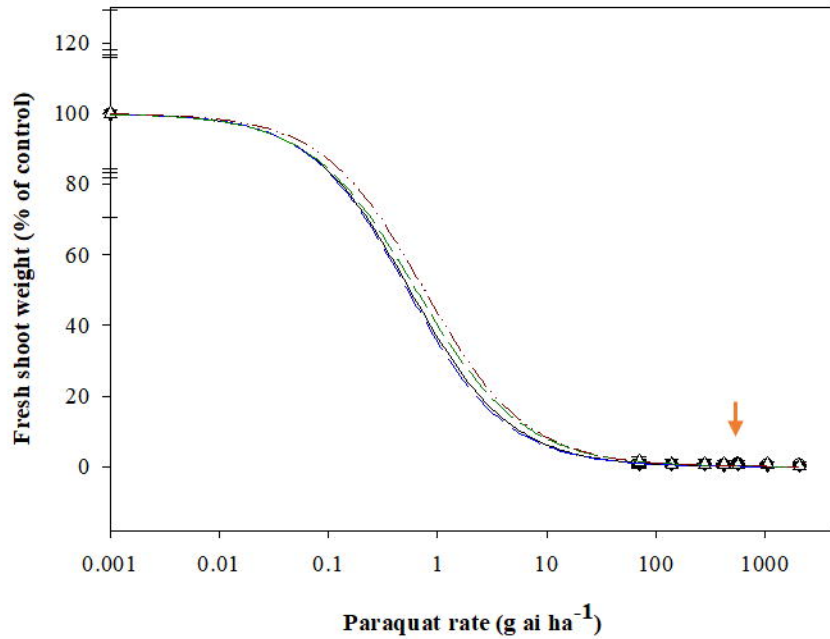

Source: https://www.biorxiv.org/content/10.1101/2020.07.04.182733v1.full.pdf
